# Supplementary material
Source: publisher figshare collection journal article supplement (https://acs.figshare.com/ndownloader/files/4009147)
Supplement: Supplementary file 1 [file 4009147]

 
data_HNP2Co(H)ClSiH2Ph
 
_audit_creation_method            SHELXL-97 
_chemical_name_systematic 
; 
 ? 
; 
_chemical_name_common             ?
_chemical_melting_point           ?
_chemical_formula_moiety          'C22 H44 Cl Co N P2 Si' 
_chemical_formula_sum 
 'C22 H44 Cl Co N P2 Si' 
_chemical_formula_weight          506.99
 
loop_ 
 _atom_type_symbol 
 _atom_type_description 
 _atom_type_scat_dispersion_real 
 _atom_type_scat_dispersion_imag 
 _atom_type_scat_source 
 'C'  'C'   0.0033   0.0016 
 'International Tables Vol C Tables 4.2.6.8 and 6.1.1.4' 
 'H'  'H'   0.0000   0.0000 
 'International Tables Vol C Tables 4.2.6.8 and 6.1.1.4' 
 'N'  'N'   0.0061   0.0033 
 'International Tables Vol C Tables 4.2.6.8 and 6.1.1.4' 
 'Si'  'Si'   0.0817   0.0704 
 'International Tables Vol C Tables 4.2.6.8 and 6.1.1.4' 
 'P'  'P'   0.1023   0.0942 
 'International Tables Vol C Tables 4.2.6.8 and 6.1.1.4' 
 'Cl'  'Cl'   0.1484   0.1585 
 'International Tables Vol C Tables 4.2.6.8 and 6.1.1.4' 
 'Co'  'Co'   0.3494   0.9721 
 'International Tables Vol C Tables 4.2.6.8 and 6.1.1.4' 
 
_symmetry_cell_setting            'monoclinic'  
_symmetry_space_group_name_H-M    'P 2 1'  
 
loop_ 
 _symmetry_equiv_pos_as_xyz 
 'x, y, z' 
 '-x, y+1/2, -z' 
 
_cell_length_a                    10.729(3) 
_cell_length_b                    20.878(3) 
_cell_length_c                    12.305(2) 
_cell_angle_alpha                 90.00 
_cell_angle_beta                  100.01(2) 
_cell_angle_gamma                 90.00 
_cell_volume                      2714(1) 
_cell_formula_units_Z             4 
_cell_measurement_temperature     100(2) 
_cell_measurement_reflns_used     5285 
_cell_measurement_theta_min       0.878 
_cell_measurement_theta_max       0.939 
 
_exptl_crystal_description        'ROD' 
_exptl_crystal_colour             'YELLOW' 
_exptl_crystal_size_max           0.15 
_exptl_crystal_size_mid           0.12 
_exptl_crystal_size_min           0.07 
_exptl_crystal_density_meas       ? 
_exptl_crystal_density_diffrn     1.243 
_exptl_crystal_density_method     'not measured' 
_exptl_crystal_F_000              1084 
_exptl_absorpt_coefficient_mu     0.902 
_exptl_absorpt_correction_type    'multi-scan' 
_exptl_absorpt_correction_T_min   0.878 
_exptl_absorpt_correction_T_max   0.939 
_exptl_absorpt_process_details    'SADABS' 
 
_exptl_special_details 
; 
 ? 
; 
 
_diffrn_ambient_temperature       100(2) 
_diffrn_radiation_wavelength      0.71073 
_diffrn_radiation_type            MoK\a 
_diffrn_radiation_source          'microfocus sealed tube'
_diffrn_radiation_monochromator   'QUAZAR multilayer mirrors' 
_diffrn_measurement_device_type   'Bruker APEX-II CCD' 
_diffrn_measurement_method        '\f and \w scans'
_diffrn_detector_area_resol_mean  8.366
_diffrn_reflns_number             47501 
_diffrn_reflns_av_R_equivalents   0.1755 
_diffrn_reflns_av_sigmaI/netI     0.1934 
_diffrn_reflns_limit_h_min        -13 
_diffrn_reflns_limit_h_max        12 
_diffrn_reflns_limit_k_min        -25 
_diffrn_reflns_limit_k_max        25 
_diffrn_reflns_limit_l_min        -14 
_diffrn_reflns_limit_l_max        14 
_diffrn_reflns_theta_min          1.68 
_diffrn_reflns_theta_max          25.65 
_reflns_number_total              10269 
_reflns_number_gt                 5285 
_reflns_threshold_expression      >2sigma(I) 
 
_computing_data_collection        'Bruker APEX2 v. 2009.1' 
_computing_cell_refinement        'Bruker APEX2 v. 2009.1' 
_computing_data_reduction         'Bruker APEX2 v. 2009.1' 
_computing_structure_solution     'SIR-97' 
_computing_structure_refinement   'SHELXL-97 (Sheldrick, 2008)' 
_computing_molecular_graphics     'ORTEP-32' 
_computing_publication_material   'WinGX' 
 
_refine_special_details 
; 
 Refinement of F^2^ against ALL reflections.  The weighted R-factor wR and 
 goodness of fit S are based on F^2^, conventional R-factors R are based 
 on F, with F set to zero for negative F^2^. The threshold expression of 
 F^2^ > 2sigma(F^2^) is used only for calculating R-factors(gt) etc. and is 
 not relevant to the choice of reflections for refinement.  R-factors based 
 on F^2^ are statistically about twice as large as those based on F, and R- 
 factors based on ALL data will be even larger. 
; 
 
_refine_ls_structure_factor_coef  Fsqd  
_refine_ls_matrix_type            full 
_refine_ls_weighting_scheme       calc  
_refine_ls_weighting_details 
 'calc w=1/[\s^2^(Fo^2^)+(0.1425P)^2^+0.0000P] where P=(Fo^2^+2Fc^2^)/3' 
_atom_sites_solution_primary      direct 
_atom_sites_solution_secondary    difmap 
_atom_sites_solution_hydrogens    geom 
_refine_ls_hydrogen_treatment     'constr' 
_refine_ls_extinction_method      none 
_refine_ls_extinction_coef        ? 
_refine_ls_abs_structure_details 
 'Flack H D (1983), Acta Cryst. A39, 876-881' 
_refine_ls_abs_structure_Flack    0.59(4) 
_refine_ls_number_reflns          9894 
_refine_ls_number_parameters      495 
_refine_ls_number_restraints      13 
_refine_ls_R_factor_all           0.1889 
_refine_ls_R_factor_gt            0.1012 
_refine_ls_wR_factor_ref          0.2818 
_refine_ls_wR_factor_gt           0.2381 
_refine_ls_goodness_of_fit_ref    1.039 
_refine_ls_restrained_S_all       1.039 
_refine_ls_shift/su_max           0.005 
_refine_ls_shift/su_mean          0.000 
 
loop_ 
 _atom_site_label 
 _atom_site_type_symbol 
 _atom_site_fract_x 
 _atom_site_fract_y 
 _atom_site_fract_z 
 _atom_site_U_iso_or_equiv 
 _atom_site_adp_type 
 _atom_site_occupancy 
 _atom_site_symmetry_multiplicity 
 _atom_site_calc_flag 
 _atom_site_refinement_flags 
 _atom_site_disorder_assembly 
 _atom_site_disorder_group 
Co2 Co 0.96318(16) 0.67250(8) 0.03541(14) 0.0383(5) Uani 1 1 d . . . 
Co1 Co 1.31843(15) 0.57389(9) 0.48693(14) 0.0399(5) Uani 1 1 d . . . 
P4 P 0.8275(3) 0.59259(15) 0.0279(3) 0.0313(8) Uani 1 1 d . . . 
Cl11 Cl 1.3039(3) 0.56524(16) 0.2933(3) 0.0426(8) Uani 1 1 d . . . 
P3 P 1.1239(4) 0.73810(18) 0.0250(3) 0.0485(11) Uani 1 1 d . . . 
P2 P 1.4510(3) 0.65492(17) 0.4924(3) 0.0379(9) Uani 1 1 d . . . 
Cl2 Cl 0.9788(3) 0.67999(19) 0.2305(3) 0.0507(10) Uani 1 1 d . . . 
Si1 Si 1.4710(3) 0.51152(19) 0.5760(3) 0.0433(10) Uani 1 1 d . . . 
HI1A H 1.5307 0.5395 0.6217 0.052 Uiso 1 1 calc R . . 
HI1B H 1.4326 0.4850 0.6259 0.052 Uiso 1 1 calc R . . 
P1 P 1.1670(3) 0.50739(19) 0.5073(3) 0.0476(10) Uani 1 1 d . . . 
Si2 Si 0.8233(4) 0.7352(2) -0.0670(3) 0.0506(11) Uani 1 1 d . . . 
HI2A H 0.8657 0.7539 -0.1229 0.061 Uiso 1 1 calc R . . 
HI2B H 0.7576 0.7075 -0.1053 0.061 Uiso 1 1 calc R . . 
N2 N 1.0993(9) 0.6037(5) 0.0660(9) 0.034(3) Uani 1 1 d . . . 
H2 H 1.1268 0.6056 0.1402 0.041 Uiso 1 1 calc R . . 
C14 C 1.5684(11) 0.6511(6) 0.4004(10) 0.034(3) Uani 1 1 d . . . 
H14 H 1.5324 0.6227 0.3396 0.041 Uiso 1 1 calc R . . 
C28 C 0.7439(11) 0.5634(6) -0.1074(9) 0.035(3) Uani 1 1 d . . . 
H28 H 0.6789 0.5954 -0.1339 0.042 Uiso 1 1 calc R . . 
C24 C 0.9362(11) 0.5272(6) 0.0846(11) 0.038(3) Uani 1 1 d . . . 
H24A H 0.9505 0.5283 0.1646 0.046 Uiso 1 1 calc R . . 
H24B H 0.8993 0.4860 0.0606 0.046 Uiso 1 1 calc R . . 
C10 C 1.3393(11) 0.7173(7) 0.4345(10) 0.041(4) Uani 1 1 d . . . 
H10A H 1.3736 0.7591 0.4573 0.050 Uiso 1 1 calc R . . 
H10B H 1.3259 0.7154 0.3545 0.050 Uiso 1 1 calc R . . 
C38 C 1.1186(13) 0.7328(8) -0.2017(14) 0.064(4) Uani 1 1 d . . . 
H38A H 1.1137 0.7560 -0.2696 0.095 Uiso 1 1 calc R . . 
H38B H 1.0421 0.7088 -0.2028 0.095 Uiso 1 1 calc R . . 
H38C H 1.1895 0.7041 -0.1932 0.095 Uiso 1 1 calc R . . 
C11 C 1.5315(12) 0.6869(7) 0.6272(10) 0.045(4) Uani 1 1 d . . . 
H11 H 1.5961 0.6553 0.6571 0.054 Uiso 1 1 calc R . . 
C1 C 1.0627(11) 0.6273(7) 0.5066(11) 0.044(4) Uani 1 1 d . . . 
H1A H 0.9936 0.6559 0.4776 0.052 Uiso 1 1 calc R . . 
H1B H 1.0828 0.6330 0.5860 0.052 Uiso 1 1 calc R . . 
C17 C 1.5669(12) 0.4564(6) 0.5012(12) 0.043(4) Uani 1 1 d . . . 
C32 C 1.2595(11) 0.6831(8) 0.0489(13) 0.058(4) Uani 1 1 d . . . 
H32A H 1.3221 0.6962 0.0052 0.070 Uiso 1 1 calc R . . 
H32B H 1.2986 0.6840 0.1261 0.070 Uiso 1 1 calc R . . 
C30 C 0.6746(14) 0.4998(8) -0.1040(12) 0.063(5) Uani 1 1 d . . . 
H30A H 0.6462 0.4848 -0.1779 0.095 Uiso 1 1 calc R . . 
H30B H 0.6030 0.5058 -0.0679 0.095 Uiso 1 1 calc R . . 
H30C H 0.7309 0.4689 -0.0640 0.095 Uiso 1 1 calc R . . 
C19 C 1.6167(16) 0.4000(8) 0.3445(15) 0.068(5) Uani 1 1 d . . . 
H19 H 1.5937 0.3898 0.2702 0.082 Uiso 1 1 calc R . . 
C29 C 0.8286(12) 0.5602(8) -0.1924(10) 0.052(4) Uani 1 1 d . . . 
H29A H 0.9022 0.5351 -0.1643 0.079 Uiso 1 1 calc R . . 
H29B H 0.8540 0.6027 -0.2088 0.079 Uiso 1 1 calc R . . 
H29C H 0.7837 0.5406 -0.2584 0.079 Uiso 1 1 calc R . . 
C12 C 1.4450(12) 0.6928(9) 0.7096(11) 0.063(5) Uani 1 1 d . . . 
H12A H 1.4942 0.6968 0.7823 0.094 Uiso 1 1 calc R . . 
H12B H 1.3925 0.6553 0.7064 0.094 Uiso 1 1 calc R . . 
H12C H 1.3926 0.7300 0.6932 0.094 Uiso 1 1 calc R . . 
C21 C 1.6722(12) 0.4241(7) 0.5581(13) 0.054(4) Uani 1 1 d . . . 
H21 H 1.6948 0.4321 0.6333 0.064 Uiso 1 1 calc R . . 
C33 C 1.168(2) 0.7977(9) 0.1362(14) 0.082(6) Uani 1 1 d . . . 
H33 H 1.1496 0.7768 0.2029 0.098 Uiso 1 1 calc R . . 
C2 C 1.0255(12) 0.5592(8) 0.4796(13) 0.061(4) Uani 1 1 d . . . 
H2A H 0.9866 0.5558 0.4025 0.073 Uiso 1 1 calc R . . 
H2B H 0.9642 0.5454 0.5242 0.073 Uiso 1 1 calc R . . 
C27 C 0.5827(13) 0.6298(9) 0.0576(14) 0.074(5) Uani 1 1 d . . . 
H27A H 0.5119 0.6161 0.0899 0.112 Uiso 1 1 calc R . . 
H27B H 0.5685 0.6187 -0.0193 0.112 Uiso 1 1 calc R . . 
H27C H 0.5925 0.6753 0.0655 0.112 Uiso 1 1 calc R . . 
C26 C 0.6793(15) 0.5336(8) 0.1722(13) 0.063(4) Uani 1 1 d . . . 
H26A H 0.6134 0.5392 0.2151 0.094 Uiso 1 1 calc R . . 
H26B H 0.7558 0.5206 0.2197 0.094 Uiso 1 1 calc R . . 
H26C H 0.6546 0.5012 0.1172 0.094 Uiso 1 1 calc R . . 
C13 C 1.6000(17) 0.7482(8) 0.6169(12) 0.071(5) Uani 1 1 d . . . 
H13A H 1.5399 0.7814 0.5921 0.107 Uiso 1 1 calc R . . 
H13B H 1.6559 0.7429 0.5646 0.107 Uiso 1 1 calc R . . 
H13C H 1.6482 0.7597 0.6874 0.107 Uiso 1 1 calc R . . 
C22 C 1.7427(15) 0.3826(7) 0.5133(15) 0.067(5) Uani 1 1 d . . . 
H22 H 1.8083 0.3606 0.5571 0.080 Uiso 1 1 calc R . . 
C25 C 0.7019(13) 0.5969(8) 0.1158(12) 0.056(4) Uani 1 1 d . . . 
H25 H 0.7363 0.6258 0.1764 0.067 Uiso 1 1 calc R . . 
C35 C 1.3023(16) 0.8167(8) 0.1642(14) 0.081(6) Uani 1 1 d . . . 
H35A H 1.3211 0.8474 0.1112 0.122 Uiso 1 1 calc R . . 
H35B H 1.3551 0.7797 0.1632 0.122 Uiso 1 1 calc R . . 
H35C H 1.3179 0.8356 0.2365 0.122 Uiso 1 1 calc R . . 
C6 C 1.1611(16) 0.4707(9) 0.6459(18) 0.085(6) Uani 1 1 d . . . 
H6 H 1.2349 0.4425 0.6631 0.102 Uiso 1 1 calc R . . 
C18 C 1.5442(16) 0.4426(7) 0.3901(13) 0.055(4) Uani 1 1 d . . . 
H18 H 1.4774 0.4630 0.3448 0.066 Uiso 1 1 calc R . . 
C37 C 1.248(3) 0.8238(13) -0.102(2) 0.181(17) Uani 1 1 d . . . 
H37A H 1.2488 0.8509 -0.0386 0.271 Uiso 1 1 calc R . . 
H37B H 1.2392 0.8495 -0.1671 0.271 Uiso 1 1 calc R . . 
H37C H 1.3250 0.7998 -0.0935 0.271 Uiso 1 1 calc R . . 
C7 C 1.181(2) 0.5262(11) 0.7346(14) 0.101(7) Uani 1 1 d . . . 
H7A H 1.1007 0.5460 0.7380 0.151 Uiso 1 1 calc R . . 
H7B H 1.2377 0.5576 0.7142 0.151 Uiso 1 1 calc R . . 
H7C H 1.2155 0.5087 0.8056 0.151 Uiso 1 1 calc R . . 
C36 C 1.1345(19) 0.7771(10) -0.1110(16) 0.086(6) Uani 1 1 d . . . 
H36 H 1.0597 0.8047 -0.1261 0.104 Uiso 1 1 calc R . . 
C3 C 1.126(2) 0.4402(11) 0.407(3) 0.183(17) Uani 1 1 d . . . 
H3 H 1.1669 0.4572 0.3476 0.219 Uiso 1 1 calc R . . 
C20 C 1.7173(18) 0.3730(10) 0.4015(17) 0.090(6) Uani 1 1 d . . . 
H20 H 1.7702 0.3478 0.3669 0.108 Uiso 1 1 calc R . . 
C5 C 1.228(2) 0.3857(10) 0.450(3) 0.153(13) Uani 1 1 d . . . 
H5A H 1.2005 0.3617 0.5079 0.229 Uiso 1 1 calc R . . 
H5B H 1.3084 0.4054 0.4776 0.229 Uiso 1 1 calc R . . 
H5C H 1.2370 0.3575 0.3901 0.229 Uiso 1 1 calc R . . 
C4 C 1.018(3) 0.4187(12) 0.343(2) 0.153(13) Uani 1 1 d . . . 
H4A H 0.9625 0.4543 0.3208 0.229 Uiso 1 1 calc R . . 
H4B H 0.9769 0.3887 0.3837 0.229 Uiso 1 1 calc R . . 
H4C H 1.0384 0.3981 0.2782 0.229 Uiso 1 1 calc R . . 
C34 C 1.079(2) 0.8556(11) 0.118(2) 0.130(10) Uani 1 1 d . . . 
H34A H 1.1221 0.8930 0.1504 0.195 Uiso 1 1 calc R . . 
H34B H 1.0062 0.8476 0.1524 0.195 Uiso 1 1 calc R . . 
H34C H 1.0514 0.8623 0.0405 0.195 Uiso 1 1 calc R . . 
C15 C 1.6940(12) 0.6201(7) 0.4546(12) 0.051(4) Uani 1 1 d . . . 
H15A H 1.7413 0.6078 0.3986 0.076 Uiso 1 1 calc R . . 
H15B H 1.6767 0.5829 0.4954 0.076 Uiso 1 1 calc R . . 
H15C H 1.7422 0.6502 0.5038 0.076 Uiso 1 1 calc R . . 
C16 C 1.5985(13) 0.7145(10) 0.3462(14) 0.079(6) Uani 1 1 d . . . 
H16A H 1.6496 0.7410 0.4002 0.119 Uiso 1 1 calc R . . 
H16B H 1.5210 0.7364 0.3176 0.119 Uiso 1 1 calc R . . 
H16C H 1.6437 0.7057 0.2871 0.119 Uiso 1 1 calc R . . 
C8 C 1.048(2) 0.4313(14) 0.655(2) 0.146(11) Uani 1 1 d . . . 
H8A H 1.0416 0.4267 0.7316 0.219 Uiso 1 1 calc R . . 
H8B H 1.0572 0.3897 0.6239 0.219 Uiso 1 1 calc R . . 
H8C H 0.9738 0.4518 0.6163 0.219 Uiso 1 1 calc R . . 
C31 C 1.2142(13) 0.6169(7) 0.0171(12) 0.052(4) Uani 1 1 d U . . 
H31A H 1.1942 0.6133 -0.0626 0.062 Uiso 1 1 calc R . . 
H31B H 1.2798 0.5860 0.0441 0.062 Uiso 1 1 calc R . . 
C23 C 1.0569(11) 0.5357(6) 0.0449(10) 0.036(3) Uani 1 1 d . . . 
H23A H 1.0457 0.5264 -0.0335 0.043 Uiso 1 1 calc R . . 
H23B H 1.1201 0.5066 0.0834 0.043 Uiso 1 1 calc R . . 
C9 C 1.2164(11) 0.7077(6) 0.4735(10) 0.034(3) Uani 1 1 d U . . 
H9A H 1.2264 0.7180 0.5514 0.040 Uiso 1 1 calc R . . 
H9B H 1.1530 0.7362 0.4336 0.040 Uiso 1 1 calc R . . 
C100 C 0.7355(17) 0.8073(7) -0.003(2) 0.112(9) Uani 1 1 d . . . 
N1 N 1.1750(8) 0.6419(5) 0.4559(9) 0.032(3) Uani 1 1 d . . . 
H1 H 1.1463 0.6391 0.3820 0.039 Uiso 1 1 calc R . . 
C140 C 0.6358(18) 0.9164(10) -0.0131(16) 0.092(6) Uiso 1 1 d . . . 
H140 H 0.6103 0.9555 -0.0458 0.110 Uiso 1 1 calc R . . 
C130 C 0.618(2) 0.8947(11) 0.0989(19) 0.110(7) Uiso 1 1 d . . . 
H130 H 0.5608 0.9205 0.1269 0.132 Uiso 1 1 calc R . . 
C101 C 0.707(3) 0.8597(15) -0.067(3) 0.161(11) Uiso 1 1 d . . . 
H010 H 0.7274 0.8629 -0.1372 0.193 Uiso 1 1 calc R . . 
C110 C 0.733(2) 0.7994(12) 0.112(2) 0.106(7) Uiso 1 1 d . . . 
H110 H 0.7749 0.7649 0.1507 0.127 Uiso 1 1 calc R . . 
C120 C 0.664(3) 0.8471(16) 0.171(3) 0.154(11) Uiso 1 1 d . . . 
H120 H 0.6533 0.8447 0.2448 0.185 Uiso 1 1 calc R . . 
 
loop_ 
 _atom_site_aniso_label 
 _atom_site_aniso_U_11 
 _atom_site_aniso_U_22 
 _atom_site_aniso_U_33 
 _atom_site_aniso_U_23 
 _atom_site_aniso_U_13 
 _atom_site_aniso_U_12 
Co2 0.0406(10) 0.0346(10) 0.0314(10) 0.0038(8) -0.0171(8) -0.0032(8) 
Co1 0.0249(9) 0.0599(13) 0.0312(10) 0.0052(9) -0.0055(7) 0.0081(8) 
P4 0.0257(17) 0.044(2) 0.0194(17) -0.0046(14) -0.0091(13) 0.0014(14) 
Cl11 0.0337(17) 0.050(2) 0.0414(18) -0.0086(17) -0.0010(14) 0.0075(16) 
P3 0.055(2) 0.048(2) 0.034(2) 0.0093(17) -0.0127(17) -0.0174(19) 
P2 0.0234(17) 0.059(3) 0.0276(19) 0.0013(16) -0.0061(14) 0.0012(15) 
Cl2 0.0261(17) 0.071(2) 0.051(2) -0.0321(19) -0.0039(15) 0.0054(17) 
Si1 0.037(2) 0.058(3) 0.033(2) 0.0074(19) 0.0017(16) 0.0075(18) 
P1 0.031(2) 0.052(2) 0.057(3) -0.0013(19) 0.0004(17) -0.0002(16) 
Si2 0.037(2) 0.066(3) 0.049(3) 0.029(2) 0.0100(18) 0.0133(19) 
N2 0.031(6) 0.042(7) 0.026(6) 0.000(5) -0.005(5) -0.011(5) 
C14 0.032(7) 0.049(9) 0.021(7) -0.006(6) -0.001(6) -0.005(6) 
C28 0.035(7) 0.039(8) 0.025(6) -0.004(6) -0.008(5) 0.007(6) 
C24 0.025(7) 0.038(8) 0.049(8) 0.000(6) 0.001(6) -0.004(6) 
C10 0.037(8) 0.054(9) 0.025(7) 0.003(6) -0.018(6) 0.014(6) 
C38 0.031(8) 0.074(12) 0.084(12) 0.005(10) 0.008(8) -0.016(8) 
C11 0.032(7) 0.067(11) 0.033(8) 0.006(7) -0.001(6) -0.004(7) 
C1 0.021(7) 0.053(9) 0.052(8) -0.005(7) -0.009(6) 0.007(6) 
C17 0.030(7) 0.046(9) 0.055(10) 0.028(7) 0.010(6) 0.000(6) 
C32 0.025(7) 0.079(12) 0.066(10) 0.013(9) -0.002(7) -0.025(7) 
C30 0.060(10) 0.083(13) 0.039(9) -0.004(8) -0.014(7) -0.028(9) 
C19 0.077(12) 0.066(11) 0.067(11) -0.012(9) 0.028(9) 0.038(9) 
C29 0.036(8) 0.093(12) 0.024(7) -0.016(8) -0.008(6) -0.008(8) 
C12 0.025(8) 0.131(16) 0.030(8) -0.012(9) -0.001(6) -0.010(8) 
C21 0.031(8) 0.060(10) 0.071(10) 0.011(8) 0.013(7) 0.001(7) 
C33 0.128(18) 0.065(13) 0.056(11) -0.006(9) 0.024(11) -0.051(12) 
C2 0.021(7) 0.084(13) 0.072(11) 0.012(9) -0.005(7) -0.002(7) 
C27 0.027(9) 0.117(16) 0.081(12) -0.020(12) 0.014(8) 0.008(9) 
C26 0.068(11) 0.073(12) 0.050(10) 0.012(9) 0.018(8) -0.002(9) 
C13 0.101(14) 0.064(12) 0.037(9) -0.016(8) -0.021(9) 0.020(10) 
C22 0.052(10) 0.048(10) 0.090(14) 0.009(9) -0.016(9) 0.010(8) 
C25 0.035(8) 0.091(13) 0.040(8) -0.010(8) 0.003(7) -0.006(8) 
C35 0.084(12) 0.070(12) 0.078(12) 0.025(10) -0.017(10) -0.043(10) 
C6 0.054(11) 0.079(13) 0.138(18) 0.036(13) 0.059(12) 0.021(9) 
C18 0.075(11) 0.040(9) 0.062(11) 0.005(8) 0.041(9) 0.016(7) 
C37 0.18(2) 0.18(3) 0.13(2) 0.11(2) -0.087(19) -0.14(2) 
C7 0.140(19) 0.132(18) 0.043(11) 0.020(11) 0.054(11) -0.007(15) 
C36 0.088(14) 0.094(15) 0.078(13) 0.055(12) 0.016(11) -0.012(11) 
C3 0.086(18) 0.078(17) 0.37(5) -0.11(2) 0.00(2) 0.009(13) 
C20 0.078(13) 0.106(16) 0.090(15) 0.015(12) 0.024(11) 0.056(12) 
C5 0.073(14) 0.082(16) 0.31(4) -0.11(2) 0.049(18) 0.006(12) 
C4 0.16(3) 0.102(19) 0.15(2) -0.012(16) -0.10(2) 0.014(17) 
C34 0.11(2) 0.086(18) 0.20(3) -0.070(18) 0.060(19) -0.036(15) 
C15 0.030(8) 0.062(10) 0.056(9) 0.021(8) -0.008(7) -0.005(7) 
C16 0.015(8) 0.160(19) 0.066(11) 0.007(12) 0.016(7) -0.005(9) 
C8 0.12(2) 0.20(3) 0.14(2) 0.06(2) 0.087(18) 0.03(2) 
C31 0.046(5) 0.057(6) 0.054(5) 0.004(4) 0.013(4) 0.000(4) 
C23 0.023(7) 0.051(8) 0.028(7) -0.019(6) -0.009(5) 0.013(6) 
C9 0.030(5) 0.034(5) 0.036(5) -0.001(4) 0.004(4) 0.004(4) 
C100 0.068(12) 0.025(8) 0.21(2) 0.044(12) -0.074(14) -0.019(8) 
N1 0.004(5) 0.051(7) 0.041(6) -0.005(5) 0.002(4) 0.002(4) 
 
_geom_special_details 
; 
 All esds (except the esd in the dihedral angle between two l.s. planes) 
 are estimated using the full covariance matrix.  The cell esds are taken 
 into account individually in the estimation of esds in distances, angles 
 and torsion angles; correlations between esds in cell parameters are only 
 used when they are defined by crystal symmetry.  An approximate (isotropic) 
 treatment of cell esds is used for estimating esds involving l.s. planes. 
; 
 
loop_ 
 _geom_bond_atom_site_label_1 
 _geom_bond_atom_site_label_2 
 _geom_bond_distance 
 _geom_bond_site_symmetry_2 
 _geom_bond_publ_flag 
Co2 N2 2.037(11) . ? 
Co2 P4 2.205(4) . ? 
Co2 Si2 2.213(4) . ? 
Co2 P3 2.223(4) . ? 
Co2 Cl2 2.382(4) . ? 
Co1 N1 2.079(10) . ? 
Co1 P1 2.184(4) . ? 
Co1 P2 2.204(4) . ? 
Co1 Si1 2.226(4) . ? 
Co1 Cl11 2.368(3) . ? 
P4 C24 1.852(13) . ? 
P4 C28 1.851(11) . ? 
P4 C25 1.871(15) . ? 
P3 C32 1.837(15) . ? 
P3 C33 1.848(18) . ? 
P3 C36 1.883(16) . ? 
P2 C10 1.827(12) . ? 
P2 C14 1.836(13) . ? 
P2 C11 1.857(13) . ? 
Si1 C17 1.887(15) . ? 
P1 C2 1.847(14) . ? 
P1 C3 1.87(2) . ? 
P1 C6 1.880(19) . ? 
Si2 C100 2.01(3) . ? 
N2 C31 1.488(17) . ? 
N2 C23 1.501(15) . ? 
C14 C15 1.539(17) . ? 
C14 C16 1.54(2) . ? 
C28 C29 1.501(17) . ? 
C28 C30 1.526(19) . ? 
C24 C23 1.472(17) . ? 
C10 C9 1.493(17) . ? 
C38 C36 1.44(2) . ? 
C11 C13 1.49(2) . ? 
C11 C12 1.495(17) . ? 
C1 N1 1.481(16) . ? 
C1 C2 1.50(2) . ? 
C17 C18 1.38(2) . ? 
C17 C21 1.395(18) . ? 
C32 C31 1.49(2) . ? 
C19 C20 1.31(2) . ? 
C19 C18 1.365(19) . ? 
C21 C22 1.33(2) . ? 
C33 C35 1.47(2) . ? 
C33 C34 1.54(3) . ? 
C27 C25 1.52(2) . ? 
C26 C25 1.53(2) . ? 
C22 C20 1.37(2) . ? 
C6 C8 1.48(3) . ? 
C6 C7 1.58(3) . ? 
C37 C36 1.54(3) . ? 
C3 C4 1.36(3) . ? 
C3 C5 1.60(3) . ? 
C9 N1 1.450(15) . ? 
C100 C101 1.35(3) . ? 
C100 C110 1.43(3) . ? 
C140 C130 1.49(3) . ? 
C140 C101 1.61(3) . ? 
C130 C120 1.37(3) . ? 
C110 C120 1.51(4) . ? 
 
loop_ 
 _geom_angle_atom_site_label_1 
 _geom_angle_atom_site_label_2 
 _geom_angle_atom_site_label_3 
 _geom_angle 
 _geom_angle_site_symmetry_1 
 _geom_angle_site_symmetry_3 
 _geom_angle_publ_flag 
N2 Co2 P4 85.5(3) . . ? 
N2 Co2 Si2 156.4(3) . . ? 
P4 Co2 Si2 92.67(15) . . ? 
N2 Co2 P3 84.6(3) . . ? 
P4 Co2 P3 167.57(17) . . ? 
Si2 Co2 P3 93.36(16) . . ? 
N2 Co2 Cl2 86.4(3) . . ? 
P4 Co2 Cl2 91.26(14) . . ? 
Si2 Co2 Cl2 117.17(16) . . ? 
P3 Co2 Cl2 95.63(14) . . ? 
N1 Co1 P1 85.0(3) . . ? 
N1 Co1 P2 86.3(3) . . ? 
P1 Co1 P2 166.75(17) . . ? 
N1 Co1 Si1 161.3(3) . . ? 
P1 Co1 Si1 93.99(16) . . ? 
P2 Co1 Si1 91.07(15) . . ? 
N1 Co1 Cl11 87.2(3) . . ? 
P1 Co1 Cl11 98.47(15) . . ? 
P2 Co1 Cl11 91.04(14) . . ? 
Si1 Co1 Cl11 111.40(14) . . ? 
C24 P4 C28 105.7(6) . . ? 
C24 P4 C25 106.7(6) . . ? 
C28 P4 C25 104.5(6) . . ? 
C24 P4 Co2 100.0(4) . . ? 
C28 P4 Co2 119.9(4) . . ? 
C25 P4 Co2 118.4(5) . . ? 
C32 P3 C33 102.0(9) . . ? 
C32 P3 C36 104.1(8) . . ? 
C33 P3 C36 108.6(9) . . ? 
C32 P3 Co2 101.9(5) . . ? 
C33 P3 Co2 118.3(6) . . ? 
C36 P3 Co2 119.0(6) . . ? 
C10 P2 C14 105.3(6) . . ? 
C10 P2 C11 105.3(6) . . ? 
C14 P2 C11 107.7(6) . . ? 
C10 P2 Co1 99.2(5) . . ? 
C14 P2 Co1 117.2(4) . . ? 
C11 P2 Co1 120.0(5) . . ? 
C17 Si1 Co1 122.2(4) . . ? 
C2 P1 C3 103.0(9) . . ? 
C2 P1 C6 104.4(7) . . ? 
C3 P1 C6 104.7(14) . . ? 
C2 P1 Co1 102.2(5) . . ? 
C3 P1 Co1 119.6(11) . . ? 
C6 P1 Co1 120.4(7) . . ? 
C100 Si2 Co2 122.5(6) . . ? 
C31 N2 C23 110.7(10) . . ? 
C31 N2 Co2 114.4(8) . . ? 
C23 N2 Co2 116.7(7) . . ? 
C15 C14 C16 108.4(11) . . ? 
C15 C14 P2 113.2(9) . . ? 
C16 C14 P2 116.6(10) . . ? 
C29 C28 C30 109.7(11) . . ? 
C29 C28 P4 112.6(8) . . ? 
C30 C28 P4 115.1(9) . . ? 
C23 C24 P4 108.6(9) . . ? 
C9 C10 P2 109.6(9) . . ? 
C13 C11 C12 111.1(13) . . ? 
C13 C11 P2 113.1(9) . . ? 
C12 C11 P2 112.8(9) . . ? 
N1 C1 C2 107.8(11) . . ? 
C18 C17 C21 112.7(14) . . ? 
C18 C17 Si1 126.4(10) . . ? 
C21 C17 Si1 120.8(12) . . ? 
C31 C32 P3 108.9(9) . . ? 
C20 C19 C18 122.5(18) . . ? 
C22 C21 C17 125.1(16) . . ? 
C35 C33 C34 112.4(15) . . ? 
C35 C33 P3 118.0(15) . . ? 
C34 C33 P3 110.4(15) . . ? 
C1 C2 P1 109.6(9) . . ? 
C21 C22 C20 118.9(14) . . ? 
C27 C25 C26 114.7(13) . . ? 
C27 C25 P4 112.4(11) . . ? 
C26 C25 P4 114.1(11) . . ? 
C8 C6 C7 111.5(16) . . ? 
C8 C6 P1 116.9(16) . . ? 
C7 C6 P1 107.9(12) . . ? 
C19 C18 C17 121.9(16) . . ? 
C38 C36 C37 116.7(19) . . ? 
C38 C36 P3 113.3(13) . . ? 
C37 C36 P3 112.0(14) . . ? 
C4 C3 C5 115(2) . . ? 
C4 C3 P1 135(2) . . ? 
C5 C3 P1 104.1(18) . . ? 
C19 C20 C22 118.4(16) . . ? 
N2 C31 C32 108.6(12) . . ? 
C24 C23 N2 108.3(10) . . ? 
N1 C9 C10 110.1(10) . . ? 
C101 C100 C110 129(3) . . ? 
C101 C100 Si2 117(2) . . ? 
C110 C100 Si2 113.1(14) . . ? 
C9 N1 C1 112.5(9) . . ? 
C9 N1 Co1 115.0(7) . . ? 
C1 N1 Co1 114.4(8) . . ? 
C130 C140 C101 107(2) . . ? 
C120 C130 C140 137(3) . . ? 
C100 C101 C140 115(3) . . ? 
C100 C110 C120 120(3) . . ? 
C130 C120 C110 108(3) . . ? 
 
_diffrn_measured_fraction_theta_max    0.974 
_diffrn_reflns_theta_full              25.65 
_diffrn_measured_fraction_theta_full   0.974 
_refine_diff_density_max    1.293 
_refine_diff_density_min   -0.866 
_refine_diff_density_rms    0.139 


_iucr_refine_instructions_details
;
TITL srd530 in P2(1)
CELL  0.71073  10.7291  20.8782  12.3049   90.000  100.014   90.000
ZERR     4.00   0.0018   0.0040   0.0021    0.000    0.009    0.000
LATT  -1
SYMM  - X, 1/2 + Y, - Z
SFAC  C    H    N    SI   P    CL   CO
UNIT  88   180  4    4    8    4    4
MERG   2
FMAP   2
PLAN   50
LIST   1
L.S.   4
WGHT    0.200000
FVAR       0.08589   0.08597
CO2   7    0.964000    0.672364    0.035474    11.00000    0.04204    0.04002 =
         0.02894    0.00398   -0.01392   -0.00463
CO1   7    1.318891    0.573973    0.487570    11.00000    0.02586    0.06404 =
         0.03319    0.00396   -0.00852    0.01132
P4    5    0.828979    0.592380    0.027095    11.00000    0.02979    0.04968 =
         0.02039   -0.00877   -0.00893    0.00112
CL11  6    1.303162    0.565724    0.293739    11.00000    0.03622    0.04770 =
         0.04503   -0.01090    0.00116    0.00116
P3    5    1.120468    0.738057    0.024767    11.00000    0.05684    0.04664 =
         0.04936    0.01034   -0.00573   -0.01829
P2    5    1.452527    0.654561    0.492070    11.00000    0.02441    0.05454 =
         0.03044   -0.00024   -0.00817    0.00054
CL2   6    0.978454    0.680239    0.230633    11.00000    0.02877    0.07231 =
         0.05144   -0.02766   -0.00334    0.00763
SI1   4    1.467765    0.510889    0.578997    11.00000    0.02064    0.03338 =
         0.02438    0.01197   -0.00197    0.01088
AFIX  23
HI1A  2    1.527492    0.538193    0.625972    11.00000   -1.20000
HI1B  2    1.427668    0.484148    0.627417    11.00000   -1.20000
AFIX   0
P1    5    1.166771    0.507435    0.505357    11.00000    0.03796    0.05796 =
         0.04374   -0.00368   -0.00278    0.00072
N2    3    1.101189    0.602332    0.064959    11.00000    0.02215    0.02728 =
         0.04384    0.00056    0.00266    0.00838
AFIX  13
H2    2    1.124369    0.603330    0.139679    11.00000   -1.20000
AFIX   0
C14   1    1.568167    0.652338    0.398681    11.00000    0.04548    0.05046 =
         0.02029    0.00422   -0.00448    0.01029
AFIX  13
H14   2    1.533718    0.622347    0.339805    11.00000   -1.20000
AFIX   0
C28   1    0.748312    0.563668   -0.108627    11.00000    0.04762    0.03431 =
         0.01935    0.00361   -0.00491   -0.00119
AFIX  13
H28   2    0.681975    0.595277   -0.133589    11.00000   -1.20000
AFIX   0
C24   1    0.938119    0.526306    0.088299    11.00000    0.03158    0.04803 =
         0.06132    0.04791    0.01253   -0.01678
AFIX  23
H24A  2    0.952638    0.528019    0.168284    11.00000   -1.20000
H24B  2    0.903651    0.484666    0.064456    11.00000   -1.20000
AFIX   0
C10   1    1.339289    0.715953    0.436512    11.00000    0.10846    0.03753 =
         0.03564   -0.01811   -0.05742    0.04009
AFIX  23
H10A  2    1.374853    0.757776    0.457587    11.00000   -1.20000
H10B  2    1.324088    0.713527    0.356574    11.00000   -1.20000
AFIX   0
C38   1    1.121688    0.727325   -0.200301    11.00000    0.01911    0.09709 =
         0.11607   -0.00211    0.00205   -0.03052
AFIX 137
H38A  2    1.128105    0.748950   -0.267959    11.00000   -1.50000
H38B  2    1.045568    0.702235   -0.210288    11.00000   -1.50000
H38C  2    1.193572    0.699768   -0.179881    11.00000   -1.50000
AFIX   0
C11   1    1.530343    0.687926    0.630593    11.00000    0.03899    0.06383 =
         0.03790   -0.01304   -0.01087   -0.00249
AFIX  13
H11   2    1.597163    0.657672    0.661120    11.00000   -1.20000
AFIX   0
C1    1    1.062171    0.626652    0.509600    11.00000    0.01525    0.04395 =
         0.03211    0.00405    0.00833   -0.00288
AFIX  23
H1A   2    0.992132    0.655300    0.483659    11.00000   -1.20000
H1B   2    1.085021    0.630985    0.589060    11.00000   -1.20000
AFIX   0
C17   1    1.565162    0.454816    0.499914    11.00000    0.01542    0.10490 =
         0.00791   -0.01467   -0.00352    0.03723
C32   1    1.258502    0.683163    0.050301    11.00000    0.00519    0.11833 =
         0.08368   -0.04369   -0.00553   -0.01662
AFIX  23
H32A  2    1.317149    0.692656    0.000722    11.00000   -1.20000
H32B  2    1.302723    0.687074    0.125770    11.00000   -1.20000
AFIX   0
C30   1    0.673315    0.496283   -0.095526    11.00000    0.03613    0.06540 =
         0.02970   -0.00760   -0.01062   -0.00324
AFIX 137
H30A  2    0.639313    0.479675   -0.167317    11.00000   -1.50000
H30B  2    0.605624    0.504035   -0.055437    11.00000   -1.50000
H30C  2    0.731176    0.465756   -0.056168    11.00000   -1.50000
AFIX   0
C19   1    1.620298    0.399824    0.350650    11.00000    0.04974    0.03626 =
         0.02495    0.00339   -0.00408    0.02158
AFIX  43
H19   2    1.587665    0.384522    0.280487    11.00000   -1.20000
AFIX   0
C29   1    0.822166    0.560643   -0.193924    11.00000    0.06889    0.08701 =
         0.03815    0.02010   -0.00143    0.00638
AFIX 137
H29A  2    0.900050    0.538624   -0.167327    11.00000   -1.50000
H29B  2    0.840269    0.603269   -0.215961    11.00000   -1.50000
H29C  2    0.776029    0.537992   -0.256059    11.00000   -1.50000
AFIX   0
C12   1    1.444519    0.690826    0.707337    11.00000   -0.00214    0.13639 =
         0.05077    0.01489   -0.00159    0.00251
AFIX 137
H12A  2    1.490749    0.686192    0.781048    11.00000   -1.50000
H12B  2    1.383629    0.656887    0.692013    11.00000   -1.50000
H12C  2    1.401572    0.731346    0.700458    11.00000   -1.50000
AFIX   0
C21   1    1.673500    0.427964    0.558281    11.00000    0.02816    0.06366 =
         0.08046   -0.00153    0.04741    0.00741
AFIX  43
H21   2    1.701557    0.439163    0.631606    11.00000   -1.20000
AFIX   0
C33   1    1.168638    0.796966    0.128874    11.00000    0.14636    0.05157 =
         0.06675    0.00254   -0.02818   -0.05565
AFIX  13
H33   2    1.150587    0.775218    0.194993    11.00000   -1.20000
AFIX   0
C2    1    1.025578    0.557592    0.478554    11.00000    0.02962    0.09882 =
         0.05173    0.02207   -0.00250    0.00809
AFIX  23
H2A   2    0.987889    0.555219    0.401071    11.00000   -1.20000
H2B   2    0.963867    0.542543    0.521680    11.00000   -1.20000
AFIX   0
C27   1    0.586393    0.633276    0.056928    11.00000   -0.00903    0.12619 =
         0.09010   -0.00322    0.03602   -0.02617
AFIX 137
H27A  2    0.540348    0.650645    0.110403    11.00000   -1.50000
H27B  2    0.532001    0.605578    0.007487    11.00000   -1.50000
H27C  2    0.615578    0.667567    0.015818    11.00000   -1.50000
AFIX   0
C26   1    0.679507    0.530775    0.172646    11.00000    0.07679    0.15963 =
         0.01610    0.00191    0.01359   -0.04979
AFIX 137
H26A  2    0.623446    0.537993    0.224310    11.00000   -1.50000
H26B  2    0.758094    0.513619    0.210753    11.00000   -1.50000
H26C  2    0.641456    0.500936    0.117319    11.00000   -1.50000
AFIX   0
C13   1    1.593263    0.750434    0.620175    11.00000    0.17803    0.03820 =
         0.11557   -0.00825   -0.03408   -0.01084
AFIX 137
H13A  2    1.536695    0.784589    0.630814    11.00000   -1.50000
H13B  2    1.615186    0.753852    0.548009    11.00000   -1.50000
H13C  2    1.668580    0.753270    0.674968    11.00000   -1.50000
AFIX   0
C22   1    1.741879    0.383038    0.505415    11.00000    0.03097    0.05789 =
         0.13479   -0.00994   -0.03633    0.00546
AFIX  43
H22   2    1.799601    0.356188    0.548523    11.00000   -1.20000
AFIX   0
C25   1    0.704064    0.593701    0.118157    11.00000    0.04255    0.13706 =
         0.03949   -0.04982    0.01445   -0.04899
AFIX  13
H25   2    0.740531    0.621244    0.180066    11.00000   -1.20000
AFIX   0
C35   1    1.317947    0.813523    0.164602    11.00000    0.07370    0.09949 =
         0.05703    0.02213   -0.00776   -0.04932
AFIX 137
H35A  2    1.330596    0.858745    0.157509    11.00000   -1.50000
H35B  2    1.365396    0.790788    0.117587    11.00000   -1.50000
H35C  2    1.346164    0.800829    0.239844    11.00000   -1.50000
AFIX   0
C6    1    1.162976    0.471102    0.646501    11.00000    0.12067    0.04962 =
         0.12041    0.05469    0.08630    0.02564
AFIX  13
H6    2    1.229856    0.438762    0.662475    11.00000   -1.20000
AFIX   0
C18   1    1.554743    0.445234    0.398720    11.00000    0.14583    0.05042 =
         0.23136    0.08193    0.17252    0.07268
AFIX  43
H18   2    1.498062    0.470874    0.352035    11.00000   -1.20000
AFIX   0
C37   1    1.246337    0.824964   -0.109068    11.00000    0.37278    0.11160 =
         0.05740    0.03696   -0.06258   -0.18654
AFIX  33
H37A  2    1.258639    0.854896   -0.048928    11.00000   -1.50000
H37B  2    1.234488    0.847884   -0.177729    11.00000   -1.50000
H37C  2    1.319307    0.797796   -0.104005    11.00000   -1.50000
AFIX   0
C7    1    1.178887    0.516262    0.730909    11.00000    0.09865    0.13795 =
         0.05447    0.05892    0.01802    0.01078
AFIX 137
H7A   2    1.097526    0.530819    0.742989    11.00000   -1.50000
H7B   2    1.226436    0.551934    0.710612    11.00000   -1.50000
H7C   2    1.223681    0.497199    0.797376    11.00000   -1.50000
AFIX   0
C36   1    1.117978    0.780064   -0.103023    11.00000    0.05983    0.10372 =
         0.12553    0.02774   -0.01068    0.00448
AFIX  13
H36   2    1.041220    0.806213   -0.120184    11.00000   -1.20000
AFIX   0
C3    1    1.121146    0.444402    0.382992    11.00000    0.06835    0.06397 =
         0.19535   -0.06140    0.04641   -0.03019
AFIX  13
H3    2    1.158531    0.461355    0.321689    11.00000   -1.20000
AFIX   0
C20   1    1.727125    0.378318    0.402611    11.00000    0.17449    0.16141 =
         0.03855    0.01959   -0.00927    0.10411
AFIX  43
H20   2    1.788252    0.360711    0.366438    11.00000   -1.20000
AFIX   0
C5    1    1.231385    0.385786    0.447880    11.00000    0.03573    0.08948 =
         0.24516   -0.10837   -0.03221    0.03162
AFIX 137
H5A   2    1.227539    0.383740    0.525167    11.00000   -1.50000
H5B   2    1.315385    0.397510    0.438507    11.00000   -1.50000
H5C   2    1.210340    0.344681    0.414757    11.00000   -1.50000
AFIX   0
C4    1    1.022082    0.419660    0.340098    11.00000    0.06904    0.07722 =
         0.18763    0.03090   -0.03815   -0.00045
AFIX  33
H4A   2    0.960997    0.452395    0.315004    11.00000   -1.50000
H4B   2    0.990964    0.392935    0.392970    11.00000   -1.50000
H4C   2    1.036113    0.394126    0.278471    11.00000   -1.50000
AFIX   0
C34   1    1.087264    0.857237    0.126573    11.00000    0.17774    0.06325 =
         0.15466   -0.01481    0.07713    0.00428
AFIX 137
H34A  2    1.136623    0.891110    0.165477    11.00000   -1.50000
H34B  2    1.015641    0.848456    0.161350    11.00000   -1.50000
H34C  2    1.058436    0.869986    0.051448    11.00000   -1.50000
AFIX   0
C15   1    1.698498    0.624239    0.452671    11.00000    0.04514    0.03717 =
         0.10155   -0.02796   -0.03060    0.02395
AFIX 137
H15A  2    1.732089    0.598848    0.399465    11.00000   -1.50000
H15B  2    1.687981    0.597921    0.514410    11.00000   -1.50000
H15C  2    1.755889    0.658601    0.477470    11.00000   -1.50000
AFIX   0
C16   1    1.606157    0.710141    0.341913    11.00000    0.01830    0.06495 =
         0.07746    0.00444   -0.00052    0.00992
AFIX 137
H16A  2    1.668314    0.733746    0.391761    11.00000   -1.50000
H16B  2    1.533336    0.736675    0.318627    11.00000   -1.50000
H16C  2    1.641358    0.697332    0.278687    11.00000   -1.50000
AFIX   0
C8    1    1.026005    0.438584    0.662412    11.00000    0.66653    0.32861 =
         0.49349   -0.39410    0.44337   -0.36893
AFIX 137
H8A   2    1.025585    0.394017    0.643153    11.00000   -1.50000
H8B   2    0.957996    0.460057    0.615368    11.00000   -1.50000
H8C   2    1.015269    0.442884    0.737911    11.00000   -1.50000
AFIX   0
C31   1    1.206353    0.619683    0.030019    11.00000    0.04648    0.06140 =
         0.09749    0.04100   -0.02378   -0.00579
AFIX  23
H31A  2    1.191976    0.613151   -0.049226    11.00000   -1.20000
H31B  2    1.271807    0.589679    0.061479    11.00000   -1.20000
AFIX   0
C23   1    1.057969    0.539186    0.044892    11.00000    0.01034    0.07241 =
         0.02384   -0.03499    0.00578    0.00954
AFIX  23
H23A  2    1.123006    0.509761    0.079309    11.00000   -1.20000
H23B  2    1.043464    0.531228   -0.033967    11.00000   -1.20000
AFIX   0
C9    1    1.212928    0.708745    0.477877    11.00000   -0.00328    0.05216 =
         0.06942   -0.01093   -0.01455    0.01586
AFIX  23
H9A   2    1.223697    0.717462    0.556385    11.00000   -1.20000
H9B   2    1.150266    0.738051    0.439280    11.00000   -1.20000
AFIX   0
N1    3    1.173903    0.642261    0.454710    11.00000    0.00291    0.04981 =
         0.03624   -0.01294    0.00191   -0.01614
AFIX  13
H1    2    1.144765    0.640240    0.380783    11.00000   -1.20000
HKLF    4
 
REM  srd530 in P2(1)
REM R1 =  0.1625 for   5248 Fo > 4sig(Fo)  and  0.2478 for all   9894 data
REM    457 parameters refined using      1 restraints
 
END  
     
WGHT      0.2000      0.0000 
REM Highest difference peak  6.692,  deepest hole -0.897,  1-sigma level  0.248
Q1    1   0.8217  0.7360 -0.0652  11.00000  0.05    6.69
Q2    1   0.8896  0.5102  0.5407  11.00000  0.05    3.31
Q3    1   1.3590  0.4139  1.0096  11.00000  0.05    1.79
Q4    1   0.7422  0.8030  0.1219  11.00000  0.05    1.50
Q5    1   1.3883  0.3934  0.8891  11.00000  0.05    1.40
Q6    1   0.7306  0.8084  0.0100  11.00000  0.05    1.37
Q7    1   1.3011  0.3606  0.0431  11.00000  0.05    1.34
Q8    1   0.9042  0.6758  0.0647  11.00000  0.05    1.31
Q9    1   0.6996  0.8167  0.0388  11.00000  0.05    1.20
Q10   1   1.4978  0.5054  0.6774  11.00000  0.05    1.13
Q11   1   0.8141  0.6155 -0.0609  11.00000  0.05    1.13
Q12   1   1.1713  0.9070  0.0620  11.00000  0.05    1.09
Q13   1   1.2257  0.6062  0.0116  11.00000  0.05    1.02
Q14   1   1.3309  0.4141  0.0928  11.00000  0.05    0.98
Q15   1   0.7017  0.5380 -0.0946  11.00000  0.05    0.95
Q16   1   1.0781  0.3249  0.4830  11.00000  0.05    0.93
Q17   1   1.7166  0.8609  0.8634  11.00000  0.05    0.93
Q18   1   1.5784  0.5108  0.4582  11.00000  0.05    0.91
Q19   1   1.4394  0.6744  0.0026  11.00000  0.05    0.90
Q20   1   1.0845  0.6779  0.0230  11.00000  0.05    0.88
Q21   1   1.0210  0.7312  0.0129  11.00000  0.05    0.87
Q22   1   1.0810  0.6603  0.0615  11.00000  0.05    0.87
Q23   1   1.3154  0.4366  0.3994  11.00000  0.05    0.80
Q24   1   1.6350  0.5719  0.4682  11.00000  0.05    0.80
Q25   1   0.9871  0.6588 -0.0809  11.00000  0.05    0.79
Q26   1   1.3330  0.3496  0.8222  11.00000  0.05    0.79
Q27   1   1.1612  0.5137  0.2003  11.00000  0.05    0.78
Q28   1   1.6125  0.4385  0.4842  11.00000  0.05    0.78
Q29   1   0.5404  0.4236  0.0812  11.00000  0.05    0.77
Q30   1   0.4521  0.4591 -0.0417  11.00000  0.05    0.77
Q31   1   0.8520  0.7309  0.1167  11.00000  0.05    0.76
Q32   1   1.3233  0.4412  0.5933  11.00000  0.05    0.76
Q33   1   1.0011  0.4301  0.3675  11.00000  0.05    0.75
Q34   1   1.3458  0.4416  0.4738  11.00000  0.05    0.75
Q35   1   1.2959  0.5372  0.4495  11.00000  0.05    0.74
Q36   1   0.9342  0.6127  0.0611  11.00000  0.05    0.73
Q37   1   1.0387  0.5992  0.0674  11.00000  0.05    0.73
Q38   1   1.0052  0.6418  0.1131  11.00000  0.05    0.71
Q39   1   0.9288  0.6560  0.2593  11.00000  0.05    0.71
Q40   1   0.4415  0.4455 -0.1356  11.00000  0.05    0.70
Q41   1   0.7238  0.6007  0.1039  11.00000  0.05    0.70
Q42   1   0.9613  0.7976 -0.0571  11.00000  0.05    0.70
Q43   1   0.6488  0.6721 -0.0520  11.00000  0.05    0.70
Q44   1   1.0279  0.7279 -0.1441  11.00000  0.05    0.70
Q45   1   1.1471  0.6794  0.0146  11.00000  0.05    0.70
Q46   1   1.3888  0.5654  0.4364  11.00000  0.05    0.69
Q47   1   1.1010  0.3523  0.3651  11.00000  0.05    0.69
Q48   1   1.7345  0.5848  0.5478  11.00000  0.05    0.69
Q49   1   1.4387  0.7118  0.0143  11.00000  0.05    0.68
Q50   1   1.0249  0.8359 -0.0411  11.00000  0.05    0.68


;
